# Supplementary material for: Cullin4 Is Pro-Viral during West Nile Virus Infection of Culex Mosquitoes
Source: PLoS Pathog. 2015 Sep 1;11(9):e1005143. doi: 10.1371/journal.ppat.1005143 (PMC4556628; doi:10.1371/journal.ppat.1005143)
Supplement: S2 Table — (XLS) [file ppat.1005143.s002.xls]

## Sheet: Sheet1
Transcripts significantly up-regulated after WNV infection	Fold Change (to the full figure)
CPIJ001508-RA mediator complex, subunit, putative |protein_coding|supercont3.28:991563-1000901:1|	110
CPIJ002909-RA far upstream binding protein|protein_coding|supercont3.40:68096-70732:-1|	105
CPIJ011335-RA conserved hypothetical protein|protein_coding|supercont3.355:384918-391134:1|	105
CPIJ005519-RA enolase |protein_coding|supercont3.93:23254-41779:-1|	105
CPIJ004780-RA serine palmitoyltransferase|protein_coding|supercont3.75:510008-519791:1|	98
CPIJ010035-RA conserved hypothetical protein|protein_coding|supercont3.246:491385-492515:-1|	95
CPIJ014604-RA nad dependent epimerase/dehydratase |protein_coding|supercont3.562:247552-255137:1|	92
CPIJ015287-RA conserved hypothetical protein|protein_coding|supercont3.633:190722-192048:-1|	92
CPIJ011585-RA glutamate-cysteine ligase|protein_coding|supercont3.361:354766-356780:1|	85
CPIJ005552-RA thioredoxin reductase 1, mitochondrial precursor|protein_coding|supercont3.114:411723-413444:1|	80
CPIJ005732-RA GTP-binding protein 128up|protein_coding|supercont3.98:383263-384578:-1|	75
CPIJ007014-RA splicing factor 3B subunit 3|protein_coding|supercont3.133:587992-592897:1|	75
CPIJ010110-RA conserved hypothetical protein|protein_coding|supercont3.276:463951-464608:-1|	72
CPIJ012957-RA cytosolic purine 5-nucleotidase |protein_coding|supercont3.422:3713-20581:-1|	70
CPIJ014935-RA DEAD box ATP-dependent RNA helicase |protein_coding|supercont3.584:132864-143661:1|	65
CPIJ017873-RA putative 16.8 kda salivary protein|protein_coding|supercont3.1074:44329-45267:1|	65
CPIJ000514-RA conserved hypothetical protein|protein_coding|supercont3.5:1545416-1565200:-1|	62
CPIJ006168-RA conserved hypothetical protein|protein_coding|supercont3.109:638973-645548:-1|	60
CPIJ011061-RA WD repeat protein 51A|protein_coding|supercont3.305:40756-41616:-1|	55
CPIJ010349-RA ubiquitin specific protease|protein_coding|supercont3.295:466412-509033:-1|	35
CPIJ011899-RA 40S ribosomal protein S3|protein_coding|supercont3.353:170359-171029:-1|	35
CPIJ013850-RA conserved hypothetical protein|protein_coding|supercont3.530:127946-132860:-1|	35
CPIJ016188-RA eukaryotic translation initiation factor 1A|protein_coding|supercont3.722:65922-72573:1|	35
CPIJ018234-RA translocon-associated protein subunit alpha precursor|protein_coding|supercont3.1118:64370-65404:-1|	34
CPIJ018903-RA conserved hypothetical protein|protein_coding|supercont3.1350:56550-72739:1|	33
CPIJ039706-RA Eukaryotic|misc_RNA|supercont3.8:1163539-1163836:-1|	33
CPIJ011725-RA conserved hypothetical protein|protein_coding|supercont3.352:147648-165239:-1|	33
CPIJ008340-RA 40S ribosomal protein S24|protein_coding|supercont3.176:238224-238778:-1|	33
CPIJ012257-RA ral |protein_coding|supercont3.389:206065-217293:-1|	33
CPIJ015133-RA eukaryotic translation initiation factor 3 subunit 7|protein_coding|supercont3.608:246538-248965:1|	32
CPIJ005219-RA protein disulfide isomerase |protein_coding|supercont3.108:317249-329111:1|	32
CPIJ005864-RA T-complex protein 1 subunit theta|protein_coding|supercont3.111:310754-312760:1|	32
CPIJ010008-RA conserved hypothetical protein|protein_coding|supercont3.246:260-1292:-1|	32
CPIJ002102-RA apoptosis 1 inhibitor|protein_coding|supercont3.21:671331-672560:1|	31
CPIJ004179-RA phosphoinositide-binding protein, putative |protein_coding|supercont3.64:891252-901095:1|	31
CPIJ005352-RA carbon catabolite repressor protein |protein_coding|supercont3.86:653915-658918:-1|	31
CPIJ001216-RA conserved hypothetical protein|protein_coding|supercont3.14:1687144-1692785:-1|	31
CPIJ001441-RA eukaryotic translation initiation factor 3 subunit|protein_coding|supercont3.16:1128927-1130567:-1|	31
CPIJ001668-RA tak1 binding protein-1|protein_coding|supercont3.19:677428-679105:-1|	30
CPIJ002452-RA ubiquitin thioesterase OTUB1|protein_coding|supercont3.32:1059880-1061055:-1|	30
CPIJ003330-RA coatomer subunit beta|protein_coding|supercont3.47:1156750-1159991:-1|	30
CPIJ003821-RA Sel1l protein|protein_coding|supercont3.52:1158827-1164466:1|	30
CPIJ004831-RA brefeldin A-inhibited guanine nucleotide-exchange protein 1|protein_coding|supercont3.76:951156-957664:-1|	30
CPIJ007967-RA mitochondrial import receptor subunit tom20|protein_coding|supercont3.186:293293-295306:-1|	29
CPIJ009979-RA eukaryotic translation initiation factor 4 gamma 3|protein_coding|supercont3.263:156363-159290:-1|	29
CPIJ011963-RA multidrug resistance-associated protein 1|protein_coding|supercont3.350:387727-397050:1|	29
CPIJ013692-RA tetraspanin, putative |protein_coding|supercont3.492:203850-213880:1|	29
CPIJ016072-RA SEC63 protein, putative |protein_coding|supercont3.843:78467-96124:-1|	29
CPIJ016926-RA cytochrome B5|protein_coding|supercont3.836:101496-110737:1|	29
CPIJ017329-RA brain tumor protein|protein_coding|supercont3.909:111912-114608:-1|	29
CPIJ017452-RA lysyl-tRNA synthetase|protein_coding|supercont3.933:111423-113570:1|	29
CPIJ018795-RA 14.5 kDa salivary protein, putative|protein_coding|supercont3.1284:60703-61317:1|	28
CPIJ019106-RA guanine-nucleotide exchange factor c3g |protein_coding|supercont3.1476:30708-61830:1|	28
CPIJ019164-RA conserved hypothetical protein|protein_coding|supercont3.1457:33910-44867:-1|	28
CPIJ002124-RA hippocampus abundant transcript 1 protein|protein_coding|supercont3.21:1094503-1097967:1|	28
CPIJ002908-RA conserved hypothetical protein|protein_coding|supercont3.40:58432-59486:-1|	28
CPIJ003423-RA AMP dependent ligase |protein_coding|supercont3.49:323200-327460:1|	28
CPIJ003743-RA DEAD-box helicase Dbp80|protein_coding|supercont3.51:1142384-1144701:1|	28
CPIJ010574-RA cullin |protein_coding|supercont3.81:1658784-19562701:1|	28
CPIJ003763-RA RNA polymerase II mediator complex subunit 10|protein_coding|supercont3.52:143360-143811:1|	28
CPIJ005296-RA selenoprotein T precursor|protein_coding|supercont3.83:228803-229574:1|	28
CPIJ005487-RA tubulin gamma-1 chain|protein_coding|supercont3.92:347346-348832:-1|	27
CPIJ005583-RA anillin/rhotekin|protein_coding|supercont3.114:910560-920356:1|	27
CPIJ005611-RA tumor suppressor candidate 3|protein_coding|supercont3.95:653917-655414:1|	27
CPIJ007378-RA conserved hypothetical protein|protein_coding|supercont3.147:475004-482443:-1|	27
CPIJ000699-RA salivary Cys-rich secreted peptide|protein_coding|supercont3.123:720332-720994:-1	26
CPIJ007483-RA conserved hypothetical protein|protein_coding|supercont3.141:284037-296175:1|	26
CPIJ007526-RA GTP-binding protein GTR1|protein_coding|supercont3.164:715488-716474:1|	26
CPIJ007660-RA pyrroline-5-carboxylate dehydrogenase |protein_coding|supercont3.159:281354-295296:-1|	26
CPIJ007940-RA conserved hypothetical protein|protein_coding|supercont3.181:551335-572686:-1|	26
CPIJ009982-RA rest corepressor|protein_coding|supercont3.263:183626-190655:-1|	26
CPIJ010278-RA calpain, putative |protein_coding|supercont3.262:208531-223362:-1|	25
CPIJ012681-RA ADAM metalloprotease|protein_coding|supercont3.407:234703-245795:1|	25
CPIJ012682-RA mitochondrial dicarboxylate carrier|protein_coding|supercont3.407:250151-251885:1|	25
CPIJ013244-RA conserved hypothetical protein|protein_coding|supercont3.485:254778-271370:-1|	25
CPIJ013823-RA mitochondrial import inner membrane translocase subunit Tim22|protein_coding|supercont3.491:176698-177562:1|	25
CPIJ013834-RA ARP2/3 complex 21 kDa subunit|protein_coding|supercont3.491:336886-338115:-1|	25
CPIJ013852-RA tripeptidyl-peptidase 2|protein_coding|supercont3.530:163984-170723:1|	25
CPIJ014786-RA conserved hypothetical protein|protein_coding|supercont3.588:218532-219562:-1|	25
CPIJ016121-RA conserved hypothetical protein|protein_coding|supercont3.739:6623-7157:1|	25
CPIJ017980-RA adaptin, alpha/gamma/epsilon |protein_coding|supercont3.1031:2806-14819:1|	25
CPIJ018118-RA amidase, putative|protein_coding|supercont3.1088:26116-31832:-1|	25
CPIJ018609-RA mitochondrial import inner membrane translocase subunit tim44|protein_coding|supercont3.1226:58001-64608:-1|	24
CPIJ002099-RA NADH-ubiquinone oxidoreductase sgdh subunit|protein_coding|supercont3.21:645609-646408:1|	24
CPIJ018984-RA conserved hypothetical protein|protein_coding|supercont3.1418:11907-13394:1|	24
CPIJ017247-RA microsomal signal peptidase 18 kDa subunit|protein_coding|supercont3.938:49188-50937:1|	24
CPIJ019411-RA Dual specificity tyrosine-phosphorylation-regulated kinase |protein_coding|supercont3.1644:8235-42415:-1|	24
CPIJ005508-RA DNA-J/hsp40 |protein_coding|supercont3.92:788574-791904:1|	24
CPIJ007693-RA conserved hypothetical protein|protein_coding|supercont3.175:179867-180804:1|	22
CPIJ015840-RA conserved hypothetical protein|protein_coding|supercont3.719:131908-133783:-1|	22
CPIJ002728-RA splicing factor 3A subunit 3|protein_coding|supercont3.36:997917-999554:1|	22
CPIJ007327-RA protein disulfide-isomerase A6 precursor|protein_coding|supercont3.142:771829-773139:1|	22
CPIJ004082-RA conserved hypothetical protein|protein_coding|supercont3.60:484227-502643:1|	22
CPIJ009476-RA cytochrome P450|protein_coding|supercont3.247:482630-490695:-1|	22
CPIJ004644-RA sorting nexin |protein_coding|supercont3.70:384789-402857:-1|	22
CPIJ007319-RA ATP-binding cassette sub-family E member 1|protein_coding|supercont3.142:619216-621533:-1|	22
CPIJ005939-RA carbonic anhydrase |protein_coding|supercont3.104:112788-121463:-1|	21
CPIJ008237-RA 40S ribosomal protein S2 |protein_coding|supercont3.187:286046-303023:-1|	21
CPIJ009164-RA calnexin precursor|protein_coding|supercont3.215:143274-146460:1|	21
CPIJ011277-RA vacuolar protein sorting-associated protein 26B-B|protein_coding|supercont3.322:307697-309907:-1|	21
CPIJ011908-RA traf2 and nck interacting kinase, tnik |protein_coding|supercont3.356:156255-169327:1|	21
CPIJ012024-RA GTP-binding protein SAR2|protein_coding|supercont3.367:234960-235967:1|	21
CPIJ014605-RA glutamate dehydrogenase |protein_coding|supercont3.562:263714-289705:-1|	20
CPIJ017505-RA protein-tyrosine sulfotransferase|protein_coding|supercont3.985:99274-100598:1|	20
CPIJ018434-RA calcium-transporting atpase sarcoplasmic/endoplasmic reticulum type|protein_coding|supercont3.1262:53433-70787:1|	20
CPIJ014664-RA NADPH-cytochrome P450 reductase|protein_coding|supercont3.660:270818-274480:1|	18
CPIJ004171-RA ubiquitin protein ligase |protein_coding|supercont3.64:795952-813927:-1|	15
CPIJ005149-RA ubiquitin-conjugating enzyme E2 i|protein_coding|supercont3.91:174772-178116:1|	14
CPIJ008049-RA hexokinase |protein_coding|supercont3.194:267155-278291:-1|	12
CPIJ019706-RA 26S proteasome non-ATPase regulatory subunit 2|protein_coding|supercont3.1944:25840-28982:1|	10
CPIJ013698-RA allergen, putative |protein_coding|supercont3.492:283308-295963:-1|	9
CPIJ000077-RA farnesyl-pyrophosphate synthetase|protein_coding|supercont3.1:1791189-1797466:-1|	9
CPIJ004954-RA protein I'm not dead yet|protein_coding|supercont3.77:802524-809046:1|	7
CPIJ012886-RA RING-box protein 1A |protein_coding|supercont3.1031:2806-14819:1|	7
CPIJ008203-RA transketolase |protein_coding|supercont3.168:370298-377046:1|	6
CPIJ010815-RA vacuolar protein sorting-associated protein|protein_coding|supercont3.293:110252-146996:-1|	6
CPIJ009957-RA serine/threonine-protein kinase SRPK2|protein_coding|supercont3.249:195529-197484:-1|	6
CPIJ010028-RA OV-16 antigen precursor|protein_coding|supercont3.246:429946-430731:1|	5
CPIJ012127-RA conserved hypothetical protein|protein_coding|supercont3.413:130457-131352:-1|	4
CPIJ012803-RA folate carrier protein |protein_coding|supercont3.403:192559-214386:1|	4
CPIJ015113-RA E3 ubiquitin-protein ligase Nedd-4|supercont3.403:192559-214386:1|	4
CPIJ005703-RA inorganic phosphate cotransporter, putative |protein_coding|supercont3.98:126913-136782:-1|	4
CPIJ015860-RA conserved hypothetical protein|protein_coding|supercont3.679:55209-56318:1|	3
CPIJ013497-RA eukaryotic translation initiation factor 1b|protein_coding|supercont3.469:65256-70882:-1|	3
CPIJ015415-RA Putative uncharacterized protein |protein_coding|supercont3.109:163209-186175:-1|	3
CPIJ006141-RA pantothenate kinase |protein_coding|supercont3.109:163209-186175:-1|	2
CPIJ005774-RA vacuolar proton atpases |protein_coding|supercont3.100:413762-426016:1|	2
CPIJ011068-RA pugilistDominant |protein_coding|supercont3.317:276093-376781:-1|	2
CPIJ016608-RA adp,atp carrier protein |protein_coding|supercont3.776:118965-121710:-1|	2
Transcripts significantly down-regulated after WNV infection
CPIJ011246-RA heat shock protein 83|protein_coding|supercont3.343:338255-340405:1|	2
CPIJ007655-RA DNA-directed RNA polymerase II 140 kDa polypeptide|protein_coding|supercont3.159:169512-173442:1|	2
CPIJ000992-RA juvenile hormone epoxide hydrolase 1|protein_coding|supercont3.11:1546680-1548135:1|	2
CPIJ003738-RA heterogeneous nuclear ribonucleoprotein r |protein_coding|supercont3.51:618431-667908:-1|	2
CPIJ009012-RA mixed lineage protein kinase|protein_coding|supercont3.210:423115-433123:-1|	4
CPIJ010359-RA H4 histone|protein_coding|supercont3.273:121373-121684:1|	4
CPIJ019024-RA cytochrome c |protein_coding|supercont3.1391:66658-68624:1|	4
CPIJ009961-RA stromal antigen|protein_coding|supercont3.249:303732-317621:-1|	5
CPIJ016918-RA canalicular multispecific organic anion transporter 1|protein_coding|supercont3.836:42883-52104:1|	5
CPIJ009488-RA conserved hypothetical protein|protein_coding|supercont3.235:139439-141723:1|	6
CPIJ004065-RA conserved hypothetical protein|protein_coding|supercont3.60:30054-45797:-1|	6
CPIJ007338-RA conserved hypothetical protein|protein_coding|supercont3.157:325949-347885:1|	6
CPIJ010018-RA DNA topoisomerase 2|protein_coding|supercont3.246:173540-177616:1|	7
CPIJ003341-RA conserved hypothetical protein|protein_coding|supercont3.47:1249160-1250732:1|	8
CPIJ013144-RA vacuolar ATPase M9|protein_coding|supercont3.446:351773-352590:1|	8
CPIJ008591-RA 6-phosphofructokinase|protein_coding|supercont3.202:166018-186844:1|	9
CPIJ014133-RA saposin|protein_coding|supercont3.545:130173-138797:1|	9
CPIJ002918-RA eukaryotic translation initiation factor 4 gamma |protein_coding|supercont3.40:360906-371886:-1|	9
CPIJ009366-RA chromosome region maintenance protein 1/exportin |protein_coding|supercont3.224:380308-390970:-1|	10
CPIJ000235-RA peanut protein|protein_coding|supercont3.3:2616812-2619529:-1|	10
CPIJ016407-RA 26S protease regulatory subunit 6A|protein_coding|supercont3.752:23754-25181:-1|	10
CPIJ002966-RA protein transport protein Sec61 subunit alpha isoform 2|protein_coding|supercont3.40:1146061-1147627:1|	10
CPIJ009480-RA tryptase gamma precursor|protein_coding|supercont3.247:546686-548584:-1|	12
CPIJ015561-RA chloride intracellular channel 6-like protein |protein_coding|supercont3.680:141742-146899:-1|	12
CPIJ011552-RA 26S protease regulatory subunit 4|protein_coding|supercont3.340:417096-418823:-1|	12
CPIJ006391-RA plexin-A2 precursor|protein_coding|supercont3.123:691235-713080:1|	12
CPIJ004008-RA fimbrin/plastin|protein_coding|supercont3.57:387682-393342:1|	15
CPIJ008264-RA proteasome subunit beta type 7 precursor|protein_coding|supercont3.177:391778-392870:1|	15
CPIJ005423-RA vacuolar sorting protein|protein_coding|supercont3.88:826383-841593:1|	15
CPIJ006702-RA 26S proteasome non-ATPase regulatory subunit 1|protein_coding|supercont3.127:670383-673472:1|	15
CPIJ009002-RA purine biosynthesis protein 6, pur6 |protein_coding|supercont3.210:200807-213859:1|	18
CPIJ011194-RA eukaryotic translation initiation factor 2 alpha subunit|protein_coding|supercont3.299:404866-406680:1|	18
CPIJ011241-RA ced-6 |protein_coding|supercont3.343:215658-220093:-1|	18
CPIJ012090-RA actin|protein_coding|supercont3.372:68580-70194:-1|	20
CPIJ012217-RA inositol 1,4,5-trisphosphate receptor|protein_coding|supercont3.373:22602-32988:1|	20
CPIJ012963-RA longevity assurance factor 1|protein_coding|supercont3.476:24104-32080:1|	20
CPIJ005964-RA na+/k+ atpase alpha subunit |protein_coding|supercont3.104:487349-489912:-1|	20
CPIJ011323-RA coatomer subunit alpha|protein_coding|supercont3.310:450375-454505:-1|	20
CPIJ011537-RA rasputin|protein_coding|supercont3.340:217181-219704:1|	20
CPIJ012961-RA hypothetical protein|protein_coding|supercont3.422:328538-342216:1|	22
CPIJ008595-RA ran |protein_coding|supercont3.202:203124-211506:1|	22
CPIJ005966-RA sodium/potassium-transporting ATPase alpha chain|protein_coding|supercont3.104:497581-503775:-1|	22
CPIJ001564-RA selenide|protein_coding|supercont3.17:611035-612412:-1|	22
CPIJ002906-RA conserved hypothetical protein|protein_coding|supercont3.40:43802-50453:1|	24
CPIJ003726-RA protein arginine N-methyltransferase 1|protein_coding|supercont3.51:387776-388979:1|	24
CPIJ004884-RA niemann-pick C1 |protein_coding|supercont3.78:840004-877056:-1|	24
CPIJ008183-RA kinesin-associated protein, putative |protein_coding|supercont3.183:699548-723866:1|	24
CPIJ000897-RA proteasome subunit alpha type 1|protein_coding|supercont3.9:1243217-1244493:-1|	25
CPIJ001361-RA proteasome subunit beta type 3|protein_coding|supercont3.18:1661318-1662225:1|	25
CPIJ002689-RA survivin, putative|protein_coding|supercont3.36:478070-501355:-1|	28
CPIJ003987-RA proteasome subunit beta type 1 precursor|protein_coding|supercont3.58:834579-835505:1|	28
CPIJ005064-RA alpha-amylase precursor|protein_coding|supercont3.79:167034-168725:1|	28
CPIJ007075-RA trypsin |protein_coding|supercont3.139:687621-696692:1|	28
CPIJ008327-RA pre-mRNA-splicing factor Syf2|protein_coding|supercont3.180:215472-216217:1|	30
CPIJ009201-RA n-myc downstream regulated |protein_coding|supercont3.221:195496-231055:1|	30
CPIJ011714-RA laminin subunit beta-1 precursor|protein_coding|supercont3.387:356773-363204:1|	30
CPIJ004615-RA conserved hypothetical protein|protein_coding|supercont3.69:200702-217223:-1|	32
CPIJ002428-RA vacuolar ATP synthase subunit H|protein_coding|supercont3.32:653734-659455:-1|	32
CPIJ003854-RA conserved hypothetical protein|protein_coding|supercont3.54:899973-900566:1|	32
CPIJ004829-RA cytochrome c oxidase, subunit VB, putative |protein_coding|supercont3.76:924613-931198:1|	32
CPIJ012572-RA actin|protein_coding|supercont3.396:57391-58583:1|	33
CPIJ011244-RA heat shock protein 83|protein_coding|supercont3.343:325148-327298:-1|	33
CPIJ009931-RA 26S protease regulatory subunit 8|protein_coding|supercont3.265:343943-345370:-1|	33
CPIJ002322-RA conserved hypothetical protein|protein_coding|supercont3.31:1108199-1121296:1|	33
CPIJ003005-RA coatomer subunit zeta-1|protein_coding|supercont3.45:887967-889029:1|	33
CPIJ003288-RA conserved hypothetical protein|protein_coding|supercont3.47:500515-505002:-1|	35
CPIJ004642-RA trypsin |protein_coding|supercont3.70:349586-357573:1|	35
CPIJ004648-RA igf2 mRNA binding protein, putative |protein_coding|supercont3.70:456057-461469:-1|	35
CPIJ005916-RA alanyl-tRNA synthetase|protein_coding|supercont3.113:472058-475183:1|	35
CPIJ007316-RA apyrase precursor|protein_coding|supercont3.142:463277-464917:1|	36
CPIJ008590-RA hypothetical protein|protein_coding|supercont3.202:158505-159167:1|	38
CPIJ009378-RA 46 kDa FK506-binding nuclear protein|protein_coding|supercont3.229:99007-100523:-1|	38
CPIJ011263-RA ATP-dependent RNA helicase DHX8|protein_coding|supercont3.322:64334-68170:-1|	39
CPIJ014361-RA conserved hypothetical protein|protein_coding|supercont3.538:248227-252541:-1|	40
CPIJ015789-RA uridine phosphorylase |protein_coding|supercont3.666:58169-66694:-1|	40
CPIJ001988-RA ATP-dependent RNA helicase A|protein_coding|supercont3.24:60366-64346:-1|	40
CPIJ002761-RA nuclear pore complex protein nup98|protein_coding|supercont3.36:1253373-1263934:-1|	41
CPIJ004559-RA spermatogenesis associated factor |protein_coding|supercont3.74:610236-620206:-1|	41
CPIJ007602-RA calmodulin |protein_coding|supercont3.182:726756-772369:-1|	42
CPIJ007788-RA bleomycin hydrolase |protein_coding|supercont3.162:741376-749655:-1|	45
CPIJ010023-RA hypothetical protein|protein_coding|supercont3.246:250284-251216:1|	45
CPIJ010127-RA sphingomyelin phosphodiesterase |protein_coding|supercont3.251:235758-245075:1|	45
CPIJ017204-RA MSTP126|protein_coding|supercont3.884:9345-13692:-1|	48
CPIJ017666-RA conserved hypothetical protein|protein_coding|supercont3.1034:84470-95220:1|	48
CPIJ019478-RA conserved hypothetical protein|protein_coding|supercont3.1709:48167-48701:-1|	48
CPIJ019861-RA citrate synthase, mitochondrial precursor|protein_coding|supercont3.2018:13350-14867:1|	48
CPIJ010960-RA conserved hypothetical protein|protein_coding|supercont3.337:61735-64023:1|	50
CPIJ005595-RA fatty acid synthase S-acetyltransferase|protein_coding|supercont3.95:149817-163261:1|	50
CPIJ007772-RA ATP synthase alpha subunit vacuolar |protein_coding|supercont3.162:531884-543063:1|	52
CPIJ004890-RA conserved hypothetical protein|protein_coding|supercont3.80:87854-88398:-1|	52
CPIJ039676-RA 5.8S|rRNA|supercont3.347:279642-279793:-1|	52
CPIJ008289-RA pyruvate kinase |protein_coding|supercont3.167:479341-485431:1|	55
CPIJ006068-RA utp-glucose-1-phosphate uridylyltransferase 2 |protein_coding|supercont3.106:535423-546468:1|	55
CPIJ006289-RA transmembrane 9 superfamily protein member 4|protein_coding|supercont3.112:812800-815379:1|	55
CPIJ006770-RA glucosamine-fructose-6-phosphate aminotransferase 2|protein_coding|supercont3.124:399190-401771:-1|	55
CPIJ008182-RA L47123_1 ferritin|protein_coding|supercont3.183:692685-693682:1|	55
CPIJ008366-RA mitochondrial malate dehydrogenase 2|protein_coding|supercont3.185:122247-123881:1|	58
CPIJ008660-RA ets domain-containing protein|protein_coding|supercont3.198:320510-322506:-1|	58
CPIJ011310-RA cullin-3|protein_coding|supercont3.310:8205-17493:1|	58
CPIJ011517-RA Tes39|protein_coding|supercont3.342:279121-279692:1|	60
CPIJ013503-RA NADH dehydrogenase iron-sulfur protein 3, mitochondrial precursor|protein_coding|supercont3.469:93852-95719:1|	60
CPIJ000031-RA glutathione S-transferase |protein_coding|supercont3.1:849830-859509:-1|	60
CPIJ000938-RA techylectin-5B precursor|protein_coding|supercont3.11:108169-109096:-1|	62
CPIJ001623-RA sorting nexin, putative|protein_coding|supercont3.19:255030-257877:-1|	62
CPIJ001894-RA prolyl endopeptidase|protein_coding|supercont3.26:868124-875419:1|	62
CPIJ002055-RA laminin subunit gamma-1 precursor|protein_coding|supercont3.21:93779-100374:1|	62
CPIJ003125-RA adenylyl cyclase-associated protein|protein_coding|supercont3.39:1129648-1136686:-1|	63
CPIJ003239-RA kakapo|protein_coding|supercont3.41:533346-586465:1|	63
CPIJ004838-RA 26S proteasome non-ATPase regulatory subunit 3|protein_coding|supercont3.78:68134-69615:-1|	63
CPIJ004899-RA eukaryotic translation initiation factor 3 subunit 1|protein_coding|supercont3.80:174981-179001:1|	63
CPIJ009242-RA eukaryotic translation initiation factor 3|protein_coding|supercont3.237:340338-342070:1|	64
CPIJ009445-RA DEAD box ATP-dependent RNA helicase |protein_coding|supercont3.239:397603-402745:1|	64
CPIJ009947-RA vacuolar ATP synthase subunit ac39 |protein_coding|supercont3.265:520494-528772:-1|	65
CPIJ010493-RA conserved hypothetical protein|protein_coding|supercont3.296:428615-456588:1|	65
CPIJ010958-RA arp2/3 |protein_coding|supercont3.337:34245-42137:1|	66
CPIJ011582-RA procollagen-lysine,2-oxoglutarate 5-dioxygenase 3 precursor|protein_coding|supercont3.361:326586-331758:-1|	66
CPIJ011725-RB conserved hypothetical protein|protein_coding|supercont3.352:147648-158125:-1|	66
CPIJ011945-RA methionine aminopeptidase 2|protein_coding|supercont3.350:12152-14132:-1|	68
CPIJ011992-RA hypothetical protein|protein_coding|supercont3.346:102024-103566:1|	68
CPIJ012308-RA tetratricopeptide repeat protein 35|protein_coding|supercont3.385:292562-293947:-1|	69
CPIJ012784-RA zinc finger protein 1|protein_coding|supercont3.443:338986-342266:1|	71
CPIJ013748-RA acyl-CoA desaturase 1|protein_coding|supercont3.526:165177-169909:-1|	72
CPIJ014241-RA ATP-dependent RNA helicase WM6|protein_coding|supercont3.510:303550-306114:1|	73
CPIJ014720-RA ets DNA-binding protein pokkuri|protein_coding|supercont3.585:227757-230223:-1|	75
CPIJ014768-RA histone 1, putative|protein_coding|supercont3.594:270775-271243:-1|	82
CPIJ016024-RA retinoid x receptor|protein_coding|supercont3.729:48397-65063:1|	85
CPIJ016190-RA phosphatidylinositol 4-kinase type-ii |protein_coding|supercont3.722:102776-121117:-1|	90
CPIJ016709-RA bifunctional aminoacyl-tRNA synthetase|protein_coding|supercont3.857:184898-190913:1|	91
CPIJ017373-RA glutamate carboxypeptidase|protein_coding|supercont3.906:117975-123236:-1|	93
CPIJ018128-RA septin |protein_coding|supercont3.1251:78961-94923:-1|	95
CPIJ018276-RA programmed cell death 6-interacting protein |protein_coding|supercont3.1149:2035-24626:1|	95
CPIJ018679-RA eukaryotic translation initiation factor 2A|protein_coding|supercont3.1234:85832-88032:-1|	98
CPIJ019538-RA aspartyl-tRNA synthetase|protein_coding|supercont3.1661:45996-47798:-1|	105
CPIJ019629-RA conserved hypothetical protein|protein_coding|supercont3.1740:35424-35672:-1|	110
CPIJ020143-RA CD109 antigen precursor|protein_coding|supercont3.2362:1590-15192:-1|	115
